# Supplementary material for: Human Fecal Metabolome Reflects Differences in Body Mass Index, Physical Fitness, and Blood Lipoproteins in Healthy Older Adults
Source: MDPI journal article supplement (doi:10.3390/metabo11110717), 2021-10-21
Supplement: s1 [file s1]

**Table S2.** The results from the ANOVA analysis performed on NMR (A) and GC-MS (B) based metabolite data to investigate the differences between low fitness and high fitness groups including all subjects. (HF = high fitness, LF = low fitness).

**(A) NMR metabolites**

| No. | Metabolites    | <i>p</i> -value | Effect size (%) | Fold change (HF/LF) |
|-----|----------------|-----------------|-----------------|---------------------|
| 1   | leucine        | 0.0264          | 3.02            | 0.8736              |
| 2   | isoleucine     | 0.0470          | 2.42            | 0.8816              |
| 3   | valine         | 0.0306          | 2.87            | 0.8750              |
| 4   | propionic acid | 0.0083          | 4.25            | 0.8569              |
| 5   | lactic acid    | 0.0316          | 2.83            | 0.7346              |
| 6   | alanine        | 0.0281          | 2.96            | 0.8704              |
| 7   | methionine     | 0.0084          | 4.23            | 0.7828              |
| 8   | glutamic acid  | 0.0231          | 3.16            | 0.7473              |
| 9   | sarcosine      | 0.0490          | 2.37            | 0.8628              |
| 10  | threonine      | 0.0266          | 3.02            | 0.8607              |
| 11  | phenylalanine  | 0.0454          | 2.46            | 0.8881              |

**(B) GC-MS metabolites**

| No. | Metabolites                                  | <i>p</i> -value | Effect size (%) | Fold change (HF/LF) |
|-----|----------------------------------------------|-----------------|-----------------|---------------------|
| 1   | 1,4,5,6-tetrahydropyridazine                 | 0.0453          | 2.91            | 1.1506              |
| 2   | Oxalic acid-2TMS                             | 0.0173          | 4.09            | 1.2623              |
| 3   | Glycine-2TMS                                 | 0.0401          | 3.06            | 1.5645              |
| 4   | Vinyl acetate                                | 0.0423          | 3.00            | 1.9223              |
| 5   | 6-Azathiothymine                             | 0.0139          | 4.36            | 4.0077              |
| 6   | Cyclohexanecarboxylic acid-TMS               | 0.0455          | 2.91            | 2.6325              |
| 7   | N-[4-(Dimethylamino)butyl]-N-methylacetamide | 0.0053          | 5.58            | 2.0984              |
| 8   | Oxalic acid-2TMS                             | 0.0021          | 6.75            | 3.0641              |
| 9   | Nicotinic acid-TMS                           | 0.0320          | 3.34            | 1.3830              |
| 10  | Propanedioic acid-2TMS                       | 0.0487          | 2.83            | 1.2990              |
| 11  | 2,2-Dimethyl-3-hydroxybutanoic acid-2TMS     | 0.0336          | 3.27            | 2.7446              |
| 12  | Glutamic acid-3TMS                           | 0.0496          | 2.80            | 1.6258              |
| 13  | $\alpha$ -D-Xylopyranose-4(O-TMS)            | 0.0485          | 2.83            | 2.2934              |
| 14  | Penicillamine-3TMS                           | 0.0217          | 3.81            | 3.7572              |
| 15  | Ethyl iso-allocholate                        | 0.4330          | 2.97            | 0.6974              |
| 16  | 2-Pentanol-TMS                               | 0.0324          | 3.32            | 0.5719              |
| 17  | $\beta$ -D-Xylopyranose-4TMS                 | 0.0133          | 4.20            | 2.0207              |
