# Supplementary material for: Human Fecal Metabolome Reflects Differences in Body Mass Index, Physical Fitness, and Blood Lipoproteins in Healthy Older Adults
Source: MDPI journal article supplement (doi:10.3390/metabo11110717), 2021-10-21
Supplement: s1 [file s1]

**Table S1.** A list of fecal metabolites identified from the GC-MS data. Metabolites were identified by spectral matching using LECO-Fiehn and NIST11 libraries that are extracted from the NIST11 metabolite database. The table includes the metabolite names, metabolite class (class 1 = fatty acids, class 2 = amino acids, class 3 = organic acid, class 4 = sugars, class 5 = sugar alcohols, class 6 = other metabolites), occurrence (percentage frequency of detection of a metabolite across samples), calculated in (in this study) and reported (in NIST11 metabolite library) retention indexes (RI), the difference between the reported RI and the calculated RI ( $\Delta$ RI), identification level (Identified according to the Metabolomics Standards Initiative using electron ionization–mass spectrometry and retention index-based matching), EI-MS spectral match (R.Match), mean intensity(%) and the status of discovery of the metabolites in human fecal.

| No. Of Metabolites | Metabolite Names             | Metabolite Classes | Occurrence | Retention Index (calculated) | Retention Index (reported) | $\Delta$ RI | Identification Level | R.Match | Mean (%) Intensity | Identified in fecal previously (1), never been reported in fecal before (0) |
|--------------------|------------------------------|--------------------|------------|------------------------------|----------------------------|-------------|----------------------|---------|--------------------|-----------------------------------------------------------------------------|
| 1                  | Isovaleric acid-TMS          | 1                  | 30.22      | 952                          | 932                        | 20          | 2                    | 912     | 0.7081             | 1                                                                           |
| 2                  | Sulfide-2TMS                 | 6                  | 96.64      | 969                          | 993                        | 24          | 2                    | 849     | 0.9623             | 1                                                                           |
| 3                  | Carbodiimide-2TMS            | 6                  | 93.66      | 974                          | 650                        | 324         | 3                    | 806     | 1.0709             | 0                                                                           |
| 4                  | 1,2-Ethenediol-2TMS          | 5                  | 79.1       | 985                          | -                          | -           | 3                    | 889     | 0.7882             | 1                                                                           |
| 5                  | Valeric acid-TMS             | 1                  | 98.13      | 990                          | 975                        | 15          | 2                    | 937     | 0.8493             | 1                                                                           |
| 6                  | Hexyl alcohol-TMS            | 6                  | 23.96      | 1000                         | 982                        | 18          | 2                    | 801     | 0.6870             | 0                                                                           |
| 7                  | Propylene glycol-2TMS        | 6                  | 93.75      | 1009                         | 1013                       | 4           | 2                    | 923     | 0.5908             | 1                                                                           |
| 8                  | 1,3,5-Trioxepane             | 6                  | 40.63      | 1022                         | 771                        | 251         | 3                    | 887     | 0.8313             | 0                                                                           |
| 9                  | 1,4,5,6-tetrahydropyridazine | 6                  | 86.94      | 1033                         | -                          | -           | 3                    | 876     | 1.0094             | 1                                                                           |
| 10                 | Ethenoxyethane               | 6                  | 95.90      | 1030                         | 499                        | 531         | 3                    | 929     | 0.8383             | 0                                                                           |
| 11                 | Ethanolamine-2TMS            | 6                  | 36.19      | 1034                         | 1028.8                     | 5.2         | 2                    | 881     | 0.4678             | 1                                                                           |
| 12                 | Limonene                     | 6                  | 32.84      | 1040                         | 1020                       | 20          | 3                    | 742     | 0.7390             | 1                                                                           |
| 13                 | Pentane-1,3,5-triol          | 5                  | 47.01      | 1044                         | -                          | -           | -                    | 633     | 0.8060             | 0                                                                           |

|    |                                |   |        |      |      |     |   |     |        |   |
|----|--------------------------------|---|--------|------|------|-----|---|-----|--------|---|
| 14 | Propane-1,3-diol-2TMS          | 5 | 34.33  | 1059 | 1073 | 14  | 3 | 715 | 0.6305 | 1 |
| 15 | Lactic acid-2TMS               | 3 | 95.83  | 1064 | 1057 | 7   | 2 | 922 | 0.6227 | 1 |
| 16 | Oxalic acid-2TMS               | 3 | 98.88  | 1066 | 1124 | 58  | 3 | 778 | 0.9615 | 1 |
| 17 | Caproic acid-TMS               | 1 | 98.51  | 1076 | 1071 | 5   | 2 | 853 | 0.7118 | 1 |
| 18 | Pyruvic acid-2TMS              | 1 | 86.45  | 1090 | 1100 | 10  | 2 | 825 | 0.7593 | 1 |
| 19 | Oxalic acid-2TMS               | 3 | 95.83  | 1106 | 1124 | 18  | 2 | 789 | 0.9582 | 1 |
| 20 | Amine-3TMS                     | 6 | 99.25  | 1118 | -    | -   | 3 | 763 | 1.0453 | 1 |
| 21 | Glycine-2TMS                   | 2 | 95.15  | 1123 | 1105 | 18  | 2 | 918 | 0.7321 | 1 |
| 22 | 2-Hydroxybutyric acid-2TMS     | 3 | 80.21  | 1128 | 1126 | 2   | 2 | 821 | 0.5597 | 1 |
| 23 | N-oxy-hydroxylamine-4TMS       | 6 | 91.66  | 1135 | -    | -   | - | 647 | 0.8202 | 0 |
| 24 | Vinyl acetate                  | 6 | 63.43  | 1156 | 564  | 592 | 3 | 935 | 0.5555 | 1 |
| 25 | 2-Methylphenol-TMS             | 6 | 64.58  | 1153 | 1127 | 26  | 2 | 863 | 0.6955 | 0 |
| 26 | 6-Azathiathymine               | 6 | 26.11  | 1158 | -    | -   | 3 | 693 | 0.4242 | 0 |
| 27 | 2-Hydroxyisovaleric acid-2TMS  | 1 | 82.29  | 1164 | 1178 | 14  | 2 | 814 | 0.6701 | 1 |
| 28 | 2-Butyl-1,3-dioxolane          | 6 | 32.09  | 1160 | 936  | 224 | 3 | 831 | 0.7215 | 0 |
| 29 | N-Methyl-L-prolinol            | 5 | 76.04  | 1167 | -    | -   | 3 | 850 | 0.5275 | 1 |
| 30 | Proline-2TMS                   | 2 | 87.5   | 1175 | 1302 | 127 | - | 555 | 0.7699 | 1 |
| 31 | $\beta$ -Alanine-2TMS          | 2 | 16.41  | 1190 | -    | -   | 3 | 797 | 0.3432 | 1 |
| 32 | Carbamate-3TMS                 | 6 | 44.4   | 1196 | -    | -   | 3 | 824 | 0.7134 | 1 |
| 33 | Cyclohexanecarboxylic acid-TMS | 3 | 72.30  | 1201 | 1118 | 83  | 3 | 875 | 0.3837 | 1 |
| 34 | 2-Butanol                      | 6 | 18.75  | 1214 | -    | -   | 3 | 907 | 0.7806 | 1 |
| 35 | L-Valine-2TMS                  | 2 | 100.00 | 1212 | 1234 | 22  | 2 | 875 | 0.9924 | 1 |

|    |                                              |   |        |      |      |     |   |     |        |   |
|----|----------------------------------------------|---|--------|------|------|-----|---|-----|--------|---|
| 36 | 2-Hydroxy-3-methylvaleric acid-2TMS          | 1 | 71.88  | 1236 | 1253 | 17  | 3 | 751 | 0.5674 | 1 |
| 37 | 2-Hydroxyisocaproic acid-TMS                 | 1 | 86.46  | 1233 | 1250 | 17  | 3 | 853 | 0.6512 | 1 |
| 38 | Benzoic acid-TMS                             | 3 | 99.25  | 1247 | 1232 | 15  | 2 | 947 | 0.7312 | 1 |
| 39 | Diethylene glycol-2TMS                       | 5 | 27.24  | 1242 | 1227 | 15  | 3 | 666 | 0.5861 | 1 |
| 40 | N-[4-(Dimethylamino)butyl]-N-methylacetamide | 6 | 81.34  | 1262 | -    | -   | 3 | 767 | 0.6369 | 0 |
| 41 | Oxalic acid-2TMS                             | 3 | 48.95  | 1266 | 1124 | 142 | 3 | 690 | 0.5195 | 1 |
| 42 | L-Leucine-2TMS                               | 2 | 93.75  | 1272 | 1272 | 0   | 2 | 803 | 0.9659 | 1 |
| 43 | Nicotinic acid-TMS                           | 3 | 81.34  | 1294 | 1274 | 20  | 2 | 840 | 0.8190 | 1 |
| 44 | L-Leucine-2TMS                               | 2 | 95.83  | 1294 | 1272 | 22  | 2 | 872 | 0.7555 | 1 |
| 45 | L-Proline-2TMS                               | 2 | 97.01  | 1295 | 1302 | 7   | 2 | 821 | 0.8812 | 1 |
| 46 | Phenylacetic acid-TMS                        | 3 | 100.00 | 1298 | 1273 | 25  | 2 | 820 | 0.8318 | 1 |
| 47 | Succinic acid-2TMS                           | 3 | 96.87  | 1313 | 1314 | 1   | 2 | 860 | 0.5977 | 1 |
| 48 | Pyrimidine-2(O-TMS)                          | 6 | 99.25  | 1335 | 1326 | 9   | 2 | 816 | 0.9555 | 1 |
| 49 | Propanedioic acid-2TMS                       | 3 | 88.54  | 1342 | -    | -   | 3 | 742 | 0.9600 | 1 |
| 50 | Fumaric acid-2TMS                            | 3 | 78.73  | 1350 | 1365 | 15  | 2 | 880 | 0.7821 | 1 |
| 51 | 5-Hydroxyhexanoic acid-2TMS                  | 1 | 98.80  | 1354 | 1370 | 16  | 2 | 812 | 0.9708 | 1 |
| 52 | 2-(2-Methylbutyl)oxirane                     | 6 | 30.20  | 1360 | -    | -   | 3 | 666 | 0.7843 | 0 |
| 53 | 2-Methyl-3-hydroxybutyric acid-2TMS          | 1 | 40.62  | 1375 | 1210 | 165 | 3 | 707 | 0.1618 | 1 |
| 54 | Pyrimidine, 5-methyl-2(O-TMS)                | 6 | 97.38  | 1395 | 1400 | 5   | 3 | 679 | 0.9262 | 1 |

|    |                                          |   |       |      |        |     |   |     |        |   |
|----|------------------------------------------|---|-------|------|--------|-----|---|-----|--------|---|
| 55 | Aziridine-TMS                            | 6 | 92.53 | 1339 | -      | -   | 3 | 728 | 0.8967 | 1 |
| 56 | Glutaric acid-2TMS                       | 3 | 92.16 | 1403 | 1400   | 3   | 2 | 796 | 0.7128 | 1 |
| 57 | Hydrocinnamic acid-TMS                   | 3 | 69.40 | 1415 | 1397   | 18  | 2 | 862 | 0.6369 | 1 |
| 58 | 2,2-Dimethyl-3-hydroxybutanoic acid-2TMS | 1 | 29.40 | 1434 | 1395   | 39  | 3 | 812 | 0.3690 | 0 |
| 59 | Decanoate-2TMS                           | 6 | 97.70 | 1456 | 1455   | 1   | 2 | 895 | 0.7873 | 1 |
| 60 | Malonic acid-TMS                         | 3 | 21.80 | 1493 | 1190   | 303 | 3 | 670 | 0.3286 | 1 |
| 61 | Malic acid-3TMS                          | 3 | 44.70 | 1487 | 1390   | 97  | 3 | 743 | 0.5463 | 1 |
| 62 | Adipic acid-2TMS                         | 3 | 83.30 | 1504 | 1525   | 21  | 3 | 762 | 0.7921 | 1 |
| 63 | L-Methionine-3TMS                        | 2 | 53.35 | 1515 | 1530   | 15  | 3 | 686 | 0.5525 | 1 |
| 64 | Proline-5-oxo-2TMS                       | 2 | 94.70 | 1518 | 1520.7 | 2.7 | 2 | 883 | 0.8702 | 1 |
| 65 | 3-Methyladipic acid-2TMS                 | 3 | 61.45 | 1533 | 1535   | 2   | 2 | 875 | 0.6113 | 1 |
| 66 | Erythronic acid-4TMS                     | 3 | 73.98 | 1542 | -      | -   | 3 | 827 | 0.7029 | 1 |
| 67 | 1,3-Dioxolane, 2-isopropyl               | 6 | 77.08 | 1562 | 798    | 764 | 3 | 846 | 0.7282 | 0 |
| 68 | 2-Hydroxyglutaric acid-3TMS              | 1 | 77.08 | 1572 | 1615   | 43  | 3 | 678 | 0.6127 | 1 |
| 69 | Propanone-2TMS                           | 6 | 52.23 | 1594 | -      | -   | 3 | 719 | 0.6186 | 1 |
| 70 | Penicillamine-3TMS                       | 2 | 88.54 | 1609 | 1611   | 2   | 2 | 897 | 0.6481 | 1 |
| 71 | Glutamic acid-3TMS                       | 2 | 83.20 | 1615 | 1629   | 14  | 3 | 744 | 0.6348 | 1 |
| 72 | L-Phenylalanine-2TMS                     | 2 | 86.45 | 1622 | -      | -   | 3 | 709 | 0.6116 | 1 |
| 73 | 6-Deoxy-hexose-4(O-TMS)                  | 4 | 77.60 | 1620 | -      | -   | 3 | 788 | 0.6248 | 1 |
| 74 | Benzeneacetic acid, 3-hydroxy-2TMS       | 3 | 83.58 | 1636 | 1600   | 36  | 3 | 815 | 0.5417 | 0 |
| 75 | D-Arabinopyranose-4TMS                   | 4 | 92.91 | 1640 | 1636.5 | 3.5 | 2 | 904 | 0.4484 | 0 |
| 76 | Dodecanoic acid-TMS                      | 1 | 99.60 | 1651 | 1651   | 0   | 2 | 894 | 0.6371 | 1 |

|    |                                   |   |       |      |        |      |   |     |        |   |
|----|-----------------------------------|---|-------|------|--------|------|---|-----|--------|---|
| 77 | D-Ribopyranose-4TMS               | 4 | 94.02 | 1662 | 1658   | 4    | 2 | 882 | 0.7426 | 1 |
| 78 | D-Ribopyranose-4TMS               | 4 | 52.98 | 1668 | 1641.1 | 26.9 | 2 | 803 | 0.5214 | 1 |
| 79 | 6-Deoxy-hexose-4(O-TMS)           | 4 | 38.00 | 1686 | -      | -    | 3 | 844 | 0.5558 | 1 |
| 80 | Mercaptoacetic acid-2TMS          | 3 | 95.89 | 1698 | -      | -    | 3 | 669 | 0.9197 | 0 |
| 81 | $\alpha$ -D-Xylopyranose-4(O-TMS) | 4 | 92.53 | 1707 | 1729   | 22   | 2 | 871 | 0.4216 | 1 |
| 82 | Penicillamine-3TMS                | 1 | 82.29 | 1711 | -      | -    | 3 | 822 | 0.3732 | 1 |
| 83 | 1,3-Dioxolane-2-methanol          | 6 | 27    | 1726 | -      | -    | 3 | 917 | 0.4141 | 1 |
| 84 | Octanoic acid-TMS                 | 1 | 71.80 | 1748 | 1260   | 488  | 3 | 718 | 0.7436 | 1 |
| 85 | D-Allofuranose-5TMS               | 4 | 64.10 | 1811 | 1852   | 41   | 2 | 788 | 0.5849 | 1 |
| 86 | D-Fructopyranose-5TMS             | 4 | 98.80 | 1805 | 1836   | 31   | 2 | 783 | 0.6388 | 1 |
| 87 | D-Tagatofuranose-5TMS             | 4 | 49.60 | 1795 | 1800   | 5    | 3 | 683 | 0.4779 | 1 |
| 88 | Tetradecanoic acid-TMS            | 1 | 78.30 | 1809 | 1842   | 33   | 3 | 704 | 0.6207 | 1 |
| 89 | 2-Hexenedioic acid-2TMS           | 1 | 40.60 | 1852 | -      | -    | 3 | 707 | 0.2959 | 1 |
| 90 | D-Glucose-5(O-TMS)                | 4 | 93.28 | 1850 | 1930   | 80   | 3 | 880 | 0.7331 | 1 |
| 91 | Gluconic acid, 2-methoxime-5TMS   | 3 | 27.90 | 1875 | -      | -    | 3 | 715 | 0.2755 | 0 |
| 92 | $\alpha$ -Ketobutyric acid-TMS    | 1 | 90.60 | 1883 | 989    | 894  | 3 | 743 | 0.7595 | 1 |
| 93 | $\beta$ -D-Talopyranose-5TMS      | 4 | 40.67 | 1895 | 1895.5 | 0.5  | 2 | 887 | 0.7985 | 0 |
| 94 | Pentadecanoic acid-TMS            | 1 | 99.60 | 1909 | 1942   | 33   | 3 | 868 | 0.8909 | 1 |
| 95 | Pentadecanoic acid-TMS            | 1 | 99.60 | 1917 | 1942   | 25   | 2 | 881 | 0.8465 | 1 |
| 96 | Hydrocaffeic acid-3TMS            | 3 | 52.20 | 1938 | 1950   | 12   | 3 | 774 | 0.1735 | 1 |
| 97 | Pentadecanoic acid-TMS            | 1 | 98.80 | 1945 | 1942   | 3    | 2 | 897 | 0.9299 | 1 |
| 98 | 1-Hexadecanol-O-TMS               | 6 | 94.40 | 1958 | 1965   | 7    | 2 | 886 | 0.7597 | 1 |

|     |                                                           |   |       |      |        |       |   |     |        |   |
|-----|-----------------------------------------------------------|---|-------|------|--------|-------|---|-----|--------|---|
| 99  | Palmitic acid-TMS                                         | 1 | 85.07 | 2006 | 2039   | 33    | 3 | 769 | 0.5788 | 1 |
| 100 | Ribitol-5TMS                                              | 5 | 67.70 | 2032 | 1767   | 265   | - | 631 | 0.6524 | 1 |
| 101 | 2-(Acetylamino)-2-deoxy-hexose-4(O-TMS)                   | 4 | 17.53 | 2087 | -      | -     | 3 | 668 | 0.4274 | 0 |
| 102 | L-Sorbose-5TMS                                            | 4 | 67.50 | 2111 | 1866.6 | 244.4 | - | 474 | 0.3074 | 1 |
| 103 | Heptadecanoic acid-TMS                                    | 1 | 16.70 | 2142 | 2140   | 2     | 2 | 871 | 0.4000 | 1 |
| 104 | 4-[1-(4-Methoxyphenyl)-1-methylethyl]phenoxy)silane-TMS   | 6 | 31.70 | 2204 | -      | -     | 3 | 860 | 0.6208 | 0 |
| 105 | Butanoic acid, 3-methyl-2-oxo-TMS                         | 1 | 18.7  | 2273 | -      | -     | 3 | 783 | 0.6496 | 0 |
| 106 | Linoleic acid-TMS                                         | 1 | 38.00 | 2265 | 2201   | 64    | 3 | 936 | 0.7137 | 1 |
| 107 | Glyceryl-glycoside-TMS-ether                              | 4 | 34.70 | 2291 | -      | -     | 3 | 720 | 0.4170 | 1 |
| 108 | Trans-9-octadecenoate-TMS                                 | 6 | 78.30 | 2299 | 2215   | 84    | 3 | 804 | 0.5672 | 1 |
| 109 | 2-oxo-propanoate-TMS                                      | 1 | 66.66 | 2323 | -      | -     | 3 | 825 | 0.6696 | 0 |
| 110 | Oleamide                                                  | 6 | 37.30 | 2364 | 2228   | 136   | 3 | 833 | 0.8024 | 1 |
| 111 | Myo-Inositol-phosphate-2TMS-5(O-TMS)                      | 5 | 85.40 | 2400 | -      | -     | 3 | 687 | 0.5204 | 1 |
| 112 | Uridine, 2',3',5'-tris-O-TMS                              | 6 | 59.30 | 2445 | 2444   | 1     | - | 594 | 0.7492 | 1 |
| 113 | 9,12,15-Octadecatrienoic acid-methyl-ethyl ester-2(O-TMS) | 6 | 58.20 | 2617 | -      | -     | - | 556 | 0.5313 | 0 |
| 114 | Docosanoic acid-TMS                                       | 1 | 94.70 | 2636 | 2638   | 2     | 2 | 792 | 0.6911 | 1 |
| 115 | Hexadecamethylheptasiloxane                               | 6 | 91.70 | 2691 | 1553   | 1138  | - | 447 | 0.7767 | 0 |
| 116 | Oleic acid propyl ester-2(O-TMS)                          | 6 | 44.00 | 2750 | 2784   | 34    | 3 | 760 | 0.5777 | 0 |

|     |                                                             |   |       |      |        |        |   |     |        |   |
|-----|-------------------------------------------------------------|---|-------|------|--------|--------|---|-----|--------|---|
| 117 | Carbostyryl, 3-ethyl-4-hydroxy-7-methoxy-                   | 6 | 23.80 | 2777 | -      | -      | 3 | 659 | 0.3856 | 0 |
| 118 | Dimethyl-(2-methylpropoxy)-ane-TMS                          | 6 | 80.00 | 2773 | -      | -      | 3 | 666 | 0.5673 | 0 |
| 119 | Tetracosanoic acid-TMS                                      | 1 | 91.60 | 2834 | 2829   | 5      | 3 | 755 | 0.4399 | 1 |
| 120 | 2,2,7,7-Tetramethyl-4,5-diphenyl-3,6-dioxo-2,7-disilaoctane | 6 | 31.34 | 2879 | -      | -      | 3 | 734 | 0.3244 | 0 |
| 121 | Cholesteryl chloroformate                                   | 6 | 48.8  | 2895 | -      | -      | 3 | 743 | 0.7166 | 0 |
| 122 | cis-5,8,11,14,17-Eicosapentaenoic acid-TMS                  | 1 | 89.50 | 2992 | 2380   | 612    | 3 | 787 | 0.5665 | 1 |
| 123 | Coprostan-3-ol-TMS                                          | 5 | 95.8  | 3067 | -      | -      | 3 | 815 | 0.8015 | 1 |
| 124 | $\alpha$ -Tocopherol-O-TMS                                  | 6 | 98.10 | 3131 | 3156   | 25     | - | 581 | 0.7539 | 1 |
| 125 | Ergost-8(14)-ene                                            | 6 | 98.10 | 3153 | -      | -      | 3 | 835 | 0.7869 | 0 |
| 126 | Ethyl iso-allocholate                                       | 6 | 91.6  | 3257 | -      | -      | - | 609 | 0.7768 | 1 |
| 127 | Pregnanediol                                                | 5 | 91.66 | 3263 | 2763   | 500    | 3 | 681 | 0.7132 | 1 |
| 128 | Deoxycholic acid-3TMS                                       | 3 | 17.90 | 3278 | 3012   | 266    | 3 | 768 | 0.2670 | 1 |
| 129 | 2-Pentanol-TMS                                              | 6 | 36.4  | 3452 | 833.1  | 2618.9 | 3 | 811 | 0.6068 | 1 |
| 130 | 1-(1,3-Dioxolan-2-yl)acetone                                | 6 | 76.11 | 1147 | -      | -      | 3 | 694 | 0.8794 | 0 |
| 131 | (R)-3-Hydroxybutyric acid                                   | 1 | 89.50 | 1161 | 1147.9 | 13.1   | 3 | 651 | 0.6817 | 1 |
| 132 | $\beta$ -Amino isobutyric acid                              | 3 | 87.60 | 1170 | 1148   | 22     | 3 | 729 | 0.8135 | 1 |
| 133 | 2-Hydroxy-3-methylvaleric acid-2TMS                         | 1 | 69.90 | 1240 | 1253   | 13     | 3 | 718 | 0.7901 | 1 |
| 134 | Octanoic acid-TMS                                           | 1 | 97.70 | 1264 | 1260   | 4      | 2 | 910 | 0.7866 | 1 |
| 135 | Glyceric acid-3TMS                                          | 1 | 89.50 | 1329 | 1350   | 21     | 3 | 749 | 0.7670 | 1 |

|     |                                                                           |   |        |      |        |      |   |     |        |   |
|-----|---------------------------------------------------------------------------|---|--------|------|--------|------|---|-----|--------|---|
| 136 | Hexanoic acid-TMS                                                         | 1 | 73.90  | 1359 | 1071   | 288  | 3 | 747 | 0.7033 | 1 |
| 137 | Aziridine-TMS                                                             | 6 | 59.37  | 1362 | -      | -    | 3 | 773 | 0.4902 | 1 |
| 138 | L-Aspartic acid-3TMS                                                      | 2 | 83.30  | 1468 | 1502.4 | 34.4 | - | 532 | 0.6890 | 1 |
| 139 | Oxalic acid-2TMS                                                          | 3 | 87.50  | 1552 | 1124   | 428  | 3 | 752 | 0.8401 | 1 |
| 140 | 1-[2-(Isobutyryloxy)-1-methylethyl]-2,2-dimethylpropyl 2-methylpropanoate | 6 | 98.80  | 1587 | -      | -    | 3 | 888 | 0.9835 | 0 |
| 141 | $\beta$ -Phenyllactic acid-2TMS                                           | 3 | 78.10  | 1579 | 1582   | 3    | 2 | 834 | 0.7291 | 1 |
| 142 | D-Arabinopyranose-4TMS                                                    | 4 | 93.70  | 1644 | 1636.5 | 7.5  | 3 | 654 | 0.6894 | 0 |
| 143 | $\beta$ -D-Xylopyranose-4TMS                                              | 4 | 82.40  | 1757 | 1754.8 | 2.2  | 2 | 897 | 0.4740 | 0 |
| 144 | Azelaic acid-2TMS                                                         | 3 | 88.54  | 1791 | 1787   | 4    | - | 602 | 0.7894 | 1 |
| 145 | D-Fructopyranose-5TMS                                                     | 4 | 89.50  | 1814 | 1836   | 22   | 3 | 669 | 0.5897 | 0 |
| 146 | N-Acetyl-D-glucosamine-4TMS                                               | 4 | 78.10  | 1950 | 2091   | 141  | 3 | 763 | 0.5883 | 1 |
| 147 | Myo-Inositol-6TMS                                                         | 5 | 92.50  | 2080 | 2153   | 73   | 3 | 866 | 0.6215 | 1 |
| 148 | Diethylhexyl adipate                                                      | 6 | 100.00 | 2388 | 2382   | 6    | 2 | 920 | 1.0357 | 1 |
| 149 | 19,12-Octadecadiynoic acid-TMS                                            | 3 | 58.3   | 3273 | 2311   | 962  | - | 562 | 0.4984 | 1 |
