# Supplementary material for: Human Fecal Metabolome Reflects Differences in Body Mass Index, Physical Fitness, and Blood Lipoproteins in Healthy Older Adults
Source: MDPI journal article supplement (doi:10.3390/metabo11110717), 2021-10-21
Supplement: s1 [file s1]

**Table S6.** The Pearson's correlation coefficients and *p*-values calculated between the 36 fecal metabolites and the eight lipoproteins including total *chol*, HDL*chol*, LDL*chol*, VLDL*chol*, total *chol*/HDL*chol*, total *chol*/HDL-Apo A, LDL*chol*/HDL*chol* and VLDL*chol*/HDL*chol*, including all subjects. \*Significant correlations.

| Metabolites          | coeff. | total<br><i>chol</i> | HDL<br><i>chol</i> | LDL<br><i>chol</i> | VLDL<br><i>chol</i> | total <i>chol</i> /<br>HDL <i>chol</i> | total <i>chol</i> /<br>HDL-Apo A | LDL <i>chol</i> /<br>HDL <i>chol</i> | VLDL <i>chol</i> /<br>HDL <i>chol</i> |
|----------------------|--------|----------------------|--------------------|--------------------|---------------------|----------------------------------------|----------------------------------|--------------------------------------|---------------------------------------|
| valeric acid         | r/p    | 0.04/0.57            | 0.1/0.44           | 0.01/0.44          | 0.04/0.44           | -0.03/0.67                             | -0.08/0.29                       | -0.02/0.82                           | 0.02/0.76                             |
| isovaleric acid      | r/p    | 0.1/0.19             | -0.04/0.59         | 0.1/0.21           | <b>0.15/0.05*</b>   | 0.14/0.08                              | 0.005/0.95                       | 0.14/0.08                            | <b>0.16/0.04*</b>                     |
| leucine              | r/p    | -0.09/0.24           | -0.00/0.99         | -0.08/0.32         | 0.08/0.32           | -0.05/0.54                             | -0.14/0.07                       | -0.05/0.5                            | 0.07/0.35                             |
| isoleucine           | r/p    | -0.12/0.11           | 0.02/0.81          | -0.12/0.13         | 0.06/0.42           | -0.07/0.37                             | <b>-0.17/0.03*</b>               | -0.08/0.3                            | 0.06/0.42                             |
| valine               | r/p    | -0.07/0.39           | 0.01/0.89          | -0.07/0.39         | 0.08/0.32           | -0.05/0.57                             | -0.13/0.09                       | -0.05/0.5                            | 0.07/0.39                             |
| propionic acid       | r/p    | -0.01/0.98           | 0.06/0.45          | 0.01/0.89          | 0.01/0.92           | -0.02/0.78                             | -0.14/0.08                       | 0.003/0.96                           | 0.03/0.71                             |
| ethanol              | r/p    | <b>-0.19/0.02*</b>   | -0.1/0.21          | -0.09/0.24         | -0.06/0.5           | -0.04/0.64                             | -0.05/0.55                       | -0.02/0.82                           | -0.03/0.75                            |
| lactic acid          | r/p    | <b>-0.2/0.006*</b>   | 0.003/0.96         | -0.14/0.97         | -0.09/0.3           | -0.13/0.1                              | <b>-0.16/0.046*</b>              | -0.1/0.18                            | -0.06/0.43                            |
| alanine              | r/p    | -0.1/0.19            | 0.02/0.83          | -0.09/0.28         | 0.007/0.9           | -0.08/0.32                             | -0.1/0.22                        | -0.08/0.34                           | -0.002/0.9                            |
| butyric acid         | r/p    | -0.04/0.62           | <b>0.15/0.05*</b>  | -0.06/0.42         | -0.08/0.3           | -0.12/0.12                             | <b>-0.15/0.05*</b>               | -0.1/0.2                             | -0.08/0.31                            |
| acetic acid          | r/p    | -0.06/0.4            | 0.09/0.27          | -0.04/0.64         | -0.07/0.4           | -0.1/0.21                              | -0.13/0.09                       | -0.06/0.43                           | -0.06/0.44                            |
| methionine           | r/p    | -0.04/0.66           | 0.09/0.26          | -0.07/0.36         | 0.1/0.16            | -0.1/0.23                              | <b>-0.17/0.026*</b>              | -0.1/0.19                            | 0.06/0.48                             |
| acetone              | r/p    | 0.07/0.36            | -0.01/0.85         | 0.06/0.43          | 0.03/0.72           | 0.05/0.51                              | 0.02/0.84                        | 0.05/0.52                            | 0.02/0.82                             |
| glutamic acid        | r/p    | -0.1/0.18            | 0.08/0.33          | -0.08/0.28         | -0.06/0.5           | -0.14/0.08                             | -0.11/0.16                       | -0.11/0.18                           | -0.07/0.39                            |
| pyruvic acid         | r/p    | -0.1/0.18            | 0.02/0.84          | -0.07/0.38         | -0.1/0.19           | -0.1/0.2                               | -0.08/0.29                       | -0.08/0.29                           | -0.09/0.25                            |
| aspartic acid        | r/p    | -0.07/0.38           | 0.06/0.45          | -0.09/0.26         | 0.09/0.28           | -0.09/0.28                             | -0.09/0.28                       | -0.1/0.22                            | 0.07/0.39                             |
| sarcosine            | r/p    | -0.06/0.45           | 0.003/0.96         | -0.05/0.5          | 0.009/0.9           | -0.03/0.71                             | -0.12/0.12                       | -0.03/0.67                           | 0.018/0.82                            |
| trimethylamine       | r/p    | -0.02/0.79           | -0.005/0.9         | -0.01/0.87         | 0.13/0.11           | 0.015/0.85                             | -0.016/0.84                      | 0.019/0.8                            | 0.12/0.14                             |
| lysine               | r/p    | -0.14/0.07           | 0.00/0.99          | -0.1/0.18          | -0.04/0.7           | -0.08/0.32                             | <b>-0.15/0.05*</b>               | -0.07/0.35                           | -0.01/0.89                            |
| malonic acid         | r/p    | 0.06/0.44            | 0.04/0.63          | 0.05/0.51          | 0.03/0.67           | -0.009/0.9                             | -0.002/0.97                      | 0.002/0.97                           | 0.01/0.89                             |
| methanol             | r/p    | -0.04/0.6            | 0.12/0.12          | -0.06/0.45         | -0.05/0.5           | -0.14/0.08                             | -0.14/0.08                       | -0.11/0.15                           | -0.08/0.29                            |
| carnitine            | r/p    | -0.04/0.65           | 0.12/0.12          | -0.05/0.55         | -0.09/0.3           | -0.1/0.17                              | -0.02/0.82                       | -0.09/0.27                           | -0.09/0.26                            |
| glycine              | r/p    | -0.07/0.38           | 0.02/0.8           | -0.08/0.32         | 0.057/0.55          | -0.05/0.5                              | -0.14/0.08                       | -0.06/0.42                           | -0.04/0.63                            |
| glycerol             | r/p    | -0.06/0.44           | 0.13/0.11          | -0.09/0.27         | -0.09/0.3           | -0.12/0.12                             | <b>-0.15/0.05*</b>               | -0.11/0.17                           | -0.11/0.17                            |
| guanidinoacetic acid | r/p    | 0.05/0.55            | 0.15/0.06          | -0.01/0.86         | -0.06/0.5           | -0.08/0.33                             | -0.09/0.26                       | -0.08/0.36                           | -0.1/0.23                             |
| betaine              | r/p    | -0.07/0.34           | 0.05/0.55          | -0.1/0.2           | 0.11/0.14           | -0.07/0.35                             | -0.13/0.09                       | -0.17/0.24                           | 0.1/0.24                              |
| threonine            | r/p    | -0.13/0.09           | 0.07/0.36          | -0.1/0.19          | 0.03/0.66           | -0.1/0.18                              | <b>-0.18/0.024*</b>              | -0.09/0.29                           | 0.04/0.63                             |
| malic acid           | r/p    | 0.05/0.54            | -0.47/0.6          | 0.04/0.61          | 0.09/0.25           | 0.09/0.24                              | -0.06/0.46                       | 0.08/0.33                            | <b>0.11/0.048*</b>                    |
| glucose              | r/p    | -0.03/0.68           | 0.1/0.2            | -0.04/0.62         | -0.07/0.4           | -0.1/0.23                              | -0.03/0.72                       | -0.07/0.35                           | -0.07/0.34                            |
| galactose            | r/p    | 0.02/0.78            | 0.13/0.09          | -0.003/0.9         | -0.02/0.8           | -0.07/0.34                             | -0.03/0.53                       | -0.05/0.53                           | -0.06/0.46                            |
| uracil               | r/p    | -0.11/0.16           | 0.08/0.31          | -0.07/0.37         | -0.05/0.5           | 0.14/0.08                              | <b>-0.18/0.02*</b>               | -0.09/0.24                           | -0.06/0.41                            |
| fumaric acid         | r/p    | 0.05/0.5             | -0.03/0.72         | 0.03/0.66          | 0.09/0.23           | 0.07/0.35                              | -0.08/0.33                       | 0.06/0.48                            | 0.09/0.25                             |
| tyrosine             | r/p    | -0.06/0.44           | 0.04/0.57          | -0.07/0.4          | 0.05/0.52           | -0.06/0.41                             | -0.09/0.23                       | -0.07/0.4                            | -0.04/0.57                            |
| phenylalanine        | r/p    | -0.13/0.1            | 0.01/0.86          | -0.11/0.18         | 0.04/0.61           | -0.08/0.33                             | <b>-0.16/0.04*</b>               | -0.08/0.34                           | 0.04/0.6                              |
| xanthine             | r/p    | -0.09/0.24           | 0.00/0.99          | -0.03/0.66         | -0.09/0.2           | -0.06/0.41                             | -0.13/0.1                        | -0.03/0.7                            | -0.07/0.36                            |
| formic acid          | r/p    | <b>-0.19/0.02*</b>   | -0.13/0.11         | -0.1/0.2           | -0.04/0.6           | -0.02/0.83                             | -0.08/0.32                       | -0.024/0.8                           | -0.00/0.99                            |
