# Supplementary material for: Human Fecal Metabolome Reflects Differences in Body Mass Index, Physical Fitness, and Blood Lipoproteins in Healthy Older Adults
Source: MDPI journal article supplement (doi:10.3390/metabo11110717), 2021-10-21
Supplement: s1 [file s1]

**Table S5.** The results from the ANOVA analysis performed on the sex stratified NMR based metabolite data to investigate the differences between low BMI and high BMI groups.

(A) Males

| No. | Metabolites   | <i>p</i> -value | Effect size (%) | Fold change (MH/ML) |
|-----|---------------|-----------------|-----------------|---------------------|
| 1   | leucine       | 0.0124          | 12.09           | 1.2830              |
| 2   | isoleucine    | 0.0138          | 11.75           | 1.3021              |
| 3   | valine        | 0.0156          | 11.35           | 1.2782              |
| 4   | alanine       | 0.0047          | 15.21           | 1.3273              |
| 5   | methionine    | 0.0319          | 9.06            | 1.3767              |
| 6   | lysine        | 0.0064          | 14.21           | 1.4014              |
| 7   | glycine       | 0.0049          | 15.06           | 1.2826              |
| 8   | threonine     | 0.0188          | 10.76           | 1.2915              |
| 9   | uracil        | 0.0092          | 13.04           | 1.3120              |
| 10  | tyrosine      | 0.0166          | 11.17           | 1.3117              |
| 11  | phenylalanine | 0.0038          | 15.84           | 1.3601              |
| 12  | xanthine      | 0.0307          | 9.18            | 1.4788              |

(B) Females

| No. | Metabolites   | <i>p</i> -value | Effect size (%) | Fold change (MH/ML) |
|-----|---------------|-----------------|-----------------|---------------------|
| 1   | glutamic acid | 0.0429          | 7.21            | 1.6495              |
| 2   | malic acid    | 0.0236          | 8.82            | 1.4523              |
| 3   | fumaric acid  | 0.0219          | 9.04            | 1.4487              |
