# Supplementary material for: Human Fecal Metabolome Reflects Differences in Body Mass Index, Physical Fitness, and Blood Lipoproteins in Healthy Older Adults
Source: MDPI journal article supplement (doi:10.3390/metabo11110717), 2021-10-21
Supplement: s1 [file s1]

**Table S3.** The results from the ANOVA analysis performed on the sex stratified NMR and GC-MS based metabolite data to investigate the differences between low fitness (LF) and high fitness (HF) groups.

Males NMR Metabolites

| No. | Metabolites | <i>p</i> -value | Effect size (%) | Fold change (HF/LF) |
|-----|-------------|-----------------|-----------------|---------------------|
| 1   | methionine  | 0.0134          | 7.32            | 0.7498              |
| 2   | threonine   | 0.014           | 7.23            | 0.8049              |

Females NMR Metabolites

| No. | Metabolites    | <i>p</i> -value | Effect size (%) | Fold change (HF/LF) |
|-----|----------------|-----------------|-----------------|---------------------|
| 1   | propionic acid | 0.0393          | 5.33            | 0.8298              |
| 2   | malic acid     | 0.0048          | 9.75            | 0.6775              |
| 3   | fumaric acid   | 0.0019          | 11.69           | 0.7865              |

Males GC-MS Metabolites

| No. | Metabolites                   | <i>p</i> -value | Effect size (%) | Fold change (HF/LF) |
|-----|-------------------------------|-----------------|-----------------|---------------------|
| 1   | Vinyl acetate                 | 0.0066          | 10.64           | 5.0015              |
| 2   | 6-Azathiothymine              | 0.0328          | 6.71            | 9.4809              |
| 3   | 2-Hydroxyisovaleric acid-2TMS | 0.0298          | 6.95            | 2.5287              |
| 4   | 2-Hydroxyisocaproic acid-TMS  | 0.0458          | 5.91            | 2.4201              |
| 5   | Oxalic acid-2TMS              | 0.0220          | 7.69            | 3.0843              |
| 6   | Penicillamine-3TMS            | 0.0270          | 7.19            | 2.4151              |
| 7   | 6-Deoxy-hexose-4(O-TMS)       | 0.0487          | 5.76            | 1.7455              |
| 8   | D-Arabinopyranose-4TMS        | 0.0316          | 6.81            | 4.2161              |
| 9   | D-Ribopyranose-4TMS           | 0.0283          | 7.08            | 2.7225              |
| 10  | Penicillamine-3TMS            | 0.0268          | 7.21            | 7.6182              |
| 11  | Glyceryl-glycoside-TMS-ether  | 0.0428          | 6.07            | 3.2981              |
| 12  | $\alpha$ -Tocopherol-O-TMS    | 0.0491          | 5.74            | 0.5411              |
| 13  | Ethyl iso-allocholate         | 0.0203          | 7.89            | 0.5838              |

Females GC-MS Metabolites

| No. | Metabolites                                  | <i>p</i> -value | Effect size (%) | Fold change (HF/LF) |
|-----|----------------------------------------------|-----------------|-----------------|---------------------|
| 1   | Carbodiimide-2TMS                            | 0.0460          | 5.73            | 1.2327              |
| 2   | 1,4,5,6-tetrahydropyridazine                 | 0.0087          | 9.70            | 1.3307              |
| 3   | Oxalic acid-2TMS                             | 0.0081          | 9.86            | 1.4216              |
| 4   | N-[4-(Dimethylamino)butyl]-N-methylacetamide | 0.0369          | 6.25            | 2.2540              |
| 5   | Oxalic acid-2TMS                             | 0.0371          | 6.23            | 2.9898              |
| 6   | Glutaric acid-2TMS                           | 0.0434          | 5.86            | 1.8114              |
| 7   | Dimethyl-(2-methylpropoxy)-ane-TMS           | 0.0382          | 6.16            | 0.4503              |
| 8   | $\beta$ -D-Xylopyranose-4TMS                 | 0.0463          | 5.71            | 2.3369              |
