# Supplementary material for: Human Fecal Metabolome Reflects Differences in Body Mass Index, Physical Fitness, and Blood Lipoproteins in Healthy Older Adults
Source: MDPI journal article supplement (doi:10.3390/metabo11110717), 2021-10-21
Supplement: s1 [file s1]

**Table S4.** The results from the ANOVA analysis performed on NMR based metabolite data to investigate the differences between low BMI and high BMI groups including all subjects. MH = mean high BMI, ML = mean low BMI.

| No. | Metabolites    | <i>p</i> -value | Effect size (%) | Fold change (MH/ML) |
|-----|----------------|-----------------|-----------------|---------------------|
| 1   | leucine        | 0.0032          | 7.83            | 1.2492              |
| 2   | isoleucine     | 0.0143          | 5.48            | 1.2102              |
| 3   | valine         | 0.0049          | 7.15            | 1.2391              |
| 4   | propionic acid | 0.0367          | 4.01            | 1.1678              |
| 5   | alanine        | 0.0014          | 9.15            | 1.2754              |
| 6   | methionine     | 0.0352          | 4.08            | 1.2688              |
| 7   | glutamic acid  | 0.0179          | 5.13            | 1.4895              |
| 8   | pyruvic acid   | 0.0300          | 4.33            | 1.5769              |
| 9   | lysine         | 0.0091          | 6.19            | 1.2376              |
| 10  | glycine        | 0.0076          | 6.47            | 1.2030              |
| 11  | uracil         | 0.0067          | 6.66            | 1.2345              |
| 12  | tyrosine       | 0.0232          | 4.72            | 1.2047              |
| 13  | phenylalanine  | 0.0026          | 8.17            | 1.2588              |
| 14  | xanthine       | 0.0078          | 6.41            | 1.3692              |
