# Supplementary material for: Human Fecal Metabolome Reflects Differences in Body Mass Index, Physical Fitness, and Blood Lipoproteins in Healthy Older Adults
Source: MDPI journal article supplement (doi:10.3390/metabo11110717), 2021-10-21
Supplement: s1 [file s1]

**Table S7.** The thresholds and numbers of subjects representing top 1/3 and bottom 1/3 according to the selected eight lipoproteins including total *chol*, HDL*chol*, LDL*chol*, VLDL*chol*, total *chol*/HDL*chol*, total *chol*/HDL-Apo A, LDL*chol*/HDL*chol* and VLDL*chol*/HDL*chol*.

| Lipoprotein variables              | Class    | Thresholds  | Number of Subjects |
|------------------------------------|----------|-------------|--------------------|
| total <i>chol</i> (mmol/L)         | high 1/3 | $\geq 6.2$  | 51                 |
|                                    | low 1/3  | $\leq 5.1$  | 49                 |
| HDL <i>chol</i> (mmol/L)           | high 1/3 | $\geq 2.1$  | 54                 |
|                                    | low 1/3  | $\leq 1.58$ | 54                 |
| LDL <i>chol</i> (mmol/L)           | high 1/3 | $\geq 3.6$  | 50                 |
|                                    | low 1/3  | $\leq 2.6$  | 54                 |
| VLDL <i>chol</i> (mmol/L)          | high 1/3 | $\geq 0.8$  | 40                 |
|                                    | low 1/3  | $\leq 0.4$  | 54                 |
| total <i>chol</i> /HDL <i>chol</i> | high 1/3 | $\geq 3.6$  | 54                 |
|                                    | low 1/3  | $\leq 2.65$ | 54                 |
| total <i>chol</i> /HDL-Apo A       | high 1/3 | $\geq 0.96$ | 55                 |
|                                    | low 1/3  | $\leq 0.72$ | 54                 |
| LDL <i>chol</i> /HDL <i>chol</i>   | high 1/3 | $\geq 2.22$ | 54                 |
|                                    | low 1/3  | $\leq 1.29$ | 54                 |
| VLDL <i>chol</i> /HDL <i>chol</i>  | high 1/3 | $\geq 0.4$  | 55                 |
|                                    | low 1/3  | $\leq 0.23$ | 54                 |
| tg                                 | high 1/3 | $\geq 1.49$ | 55                 |
|                                    | low 1/3  | $\leq 0.98$ | 53                 |
